# Supplementary material
Source: Elsevier journal article supplement (https://www.sciencedirect.com/science/article/pii/S0366317521000303)
Supplement: mmc1 [file S0366317521000303:mmc1.doc]

**Supplementary material**


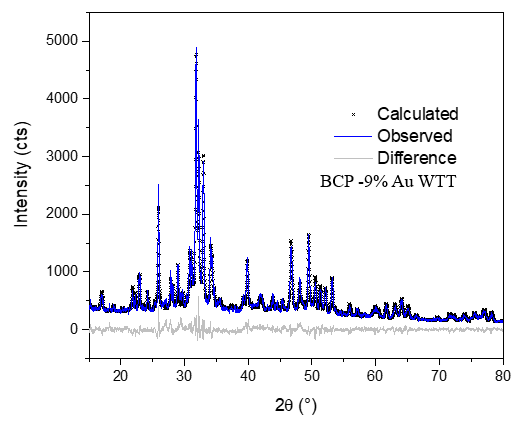


**Figure S1:** Rietveld plot for the BCP- 9% Au WTT sample

**Table S1:** Agreement factors from Rietveld refinements and the amount of the phases (wt%).

| **Sample** | **Rwp (%)** | **gof** | **Phase amount (wt%)** | | |
| --- | --- | --- | --- | --- | --- |
|  |  |  | **HA** | **α-TCP** | **β-TCP** |
| Target | 7.87 | 1.61 | 77.5(3) | 1.7(3) | 20.8(2) |
| 0.2% TT | 8.01 | 1.68 | 79(1) | 2(1) | 19(1) |
| 0.2% WTT | 9.94 | 2.18 | 82.6(8) | 10.5(6) | 6.9(7) |
| 0.7% TT | 7.58 | 1.60 | 76.0(2) | ----- | 24.0(2) |
| 0.7% WTT | 7.55 | 1.67 | 68.7(4) | 11.0(3) | 20.3(3) |
| 1% TT | 7.58 | 1.68 | 77(1) | ----- | 23(1) |
| 1% WTT | 9.23 | 2.02 | 79.2(5) | 12.5(4) | 8.3(4) |
| 2% TT | 7.65 | 1.59 | 74.7(3) | 1.1(3) | 24.2(2) |
| 2% WTT | 8.83 | 1.84 | 77.8(5) | 8.0(4) | 14.2(4) |
| 4% TT | 7.97 | 1.64 | 65.0(2) | 0.6(3) | 34.4(2) |
| 4% WTT | 7.78 | 1.61 | 64.8(3) | 0.5(2) | 34.7(2) |
| 9% TT | 8.20 | 1.66 | 75.4(2) | 0.3(2) | 24.4(1) |
| 9% WTT | 8.75 | 1.84 | 73.2(4) | 15.0(3) | 11.8(4) |

**Table S2.** Phases amount in weight proportion (wt%) for samples without thermal treatment.

| % Au | HA | error | Α- TCP | Error | β-TCP | Error |
| --- | --- | --- | --- | --- | --- | --- |
| 0 | 77,5 | 0,3 | 1,7 | 0,3 | 20,8 | 0,2 |
| 0,2 | 82,6 | 0,8 | 10,5 | 0,6 | 6,9 | 0,7 |
| 0,7 | 68,7 | 0,4 | 11 | 0,3 | 20,3 | 0,3 |
| 1 | 79,2 | 0,5 | 12,5 | 0,4 | 8,3 | 0,4 |
| 2 | 77,8 | 0,5 | 8 | 0,4 | 14,2 | 0,4 |
| 4 | 64,8 | 0,3 | 0,5 | 0,2 | 34,7 | 0,2 |
| 9 | 73,2 | 0,4 | 15 | 0,3 | 11,8 | 0,4 |

**Table S3.** Phases amount in weight proportion (wt%) for samples (a) with thermal treatment

| % Au | HA | error | Alpha TCP | Error | Beta-TCP | Error |
| --- | --- | --- | --- | --- | --- | --- |
| 0 | 77,5 | 0,3 | 1,7 | 0,3 | 20,8 | 0,2 |
| 0,2 | 79 | 1 | 2 | 1 | 19 | 1 |
| 0,7 | 76 | 0,2 | 0 | 0 | 24 | 0,2 |
| 1 | 77 | 1 | 0 | 0 | 23 | 1 |
| 2 | 74,7 | 0,3 | 1,1 | 0,3 | 24,2 | 0,3 |
| 4 | 65 | 0,2 | 0,6 | 0,3 | 34,4 | 0,2 |
| 9 | 75,4 | 0,3 | 0,3 | 0,2 | 24,4 | 0,1 |

| Pore size  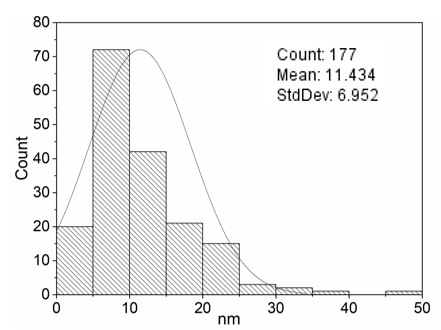 | Grain size  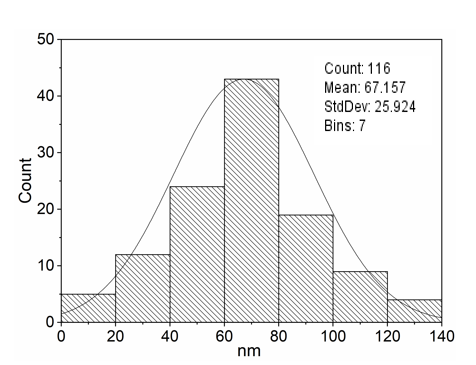 |
| --- | --- |
| 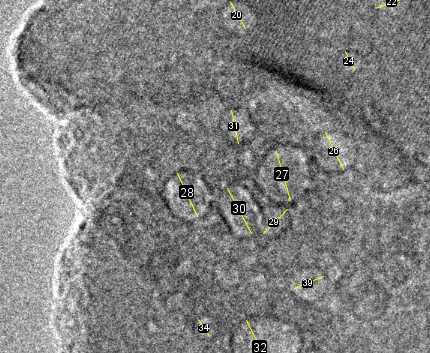 | 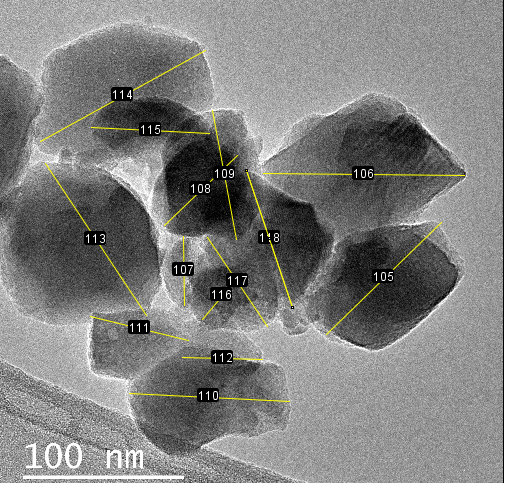 |

**Figure S2.** Statistical study with the ImageJ software of the TEM images

| 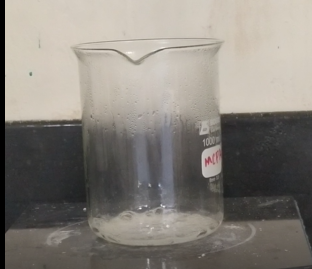 | 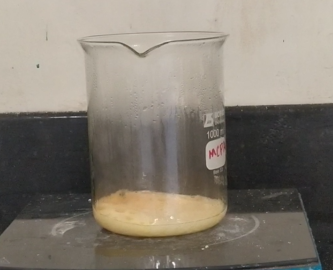 | 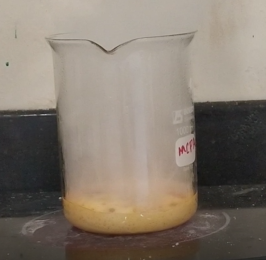 |
| --- | --- | --- |
| 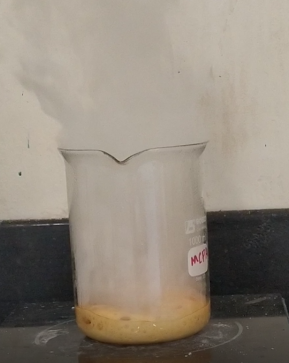 | 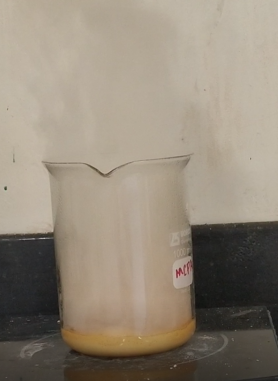 | 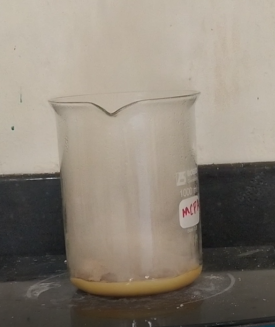 |

**Figure S3.** Combustion process, release of gases during reaction
